# Supplementary material
Source: ML conference proceedings conference paper supplement (https://openreview.net/forum?id=rblaF2euXQ)

$d=20, K=20$ , Truncated Cauchy

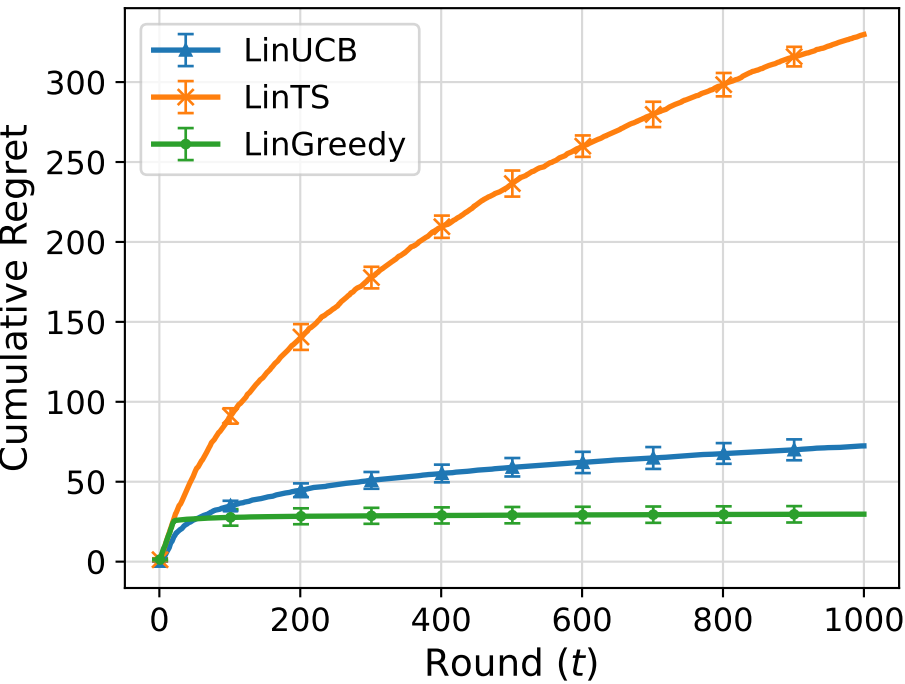

Supplement: supplementary_material [file attachment]

$d=100, K=20$ , Truncated Student t

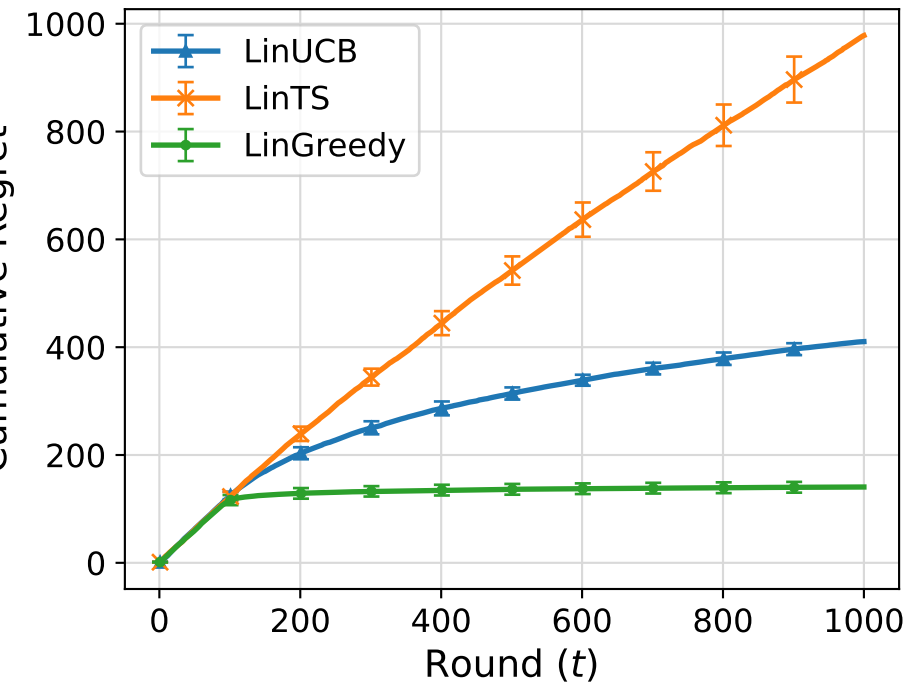

Supplement: supplementary_material [file attachment]

$d=20, K=100$ , Truncated Cauchy

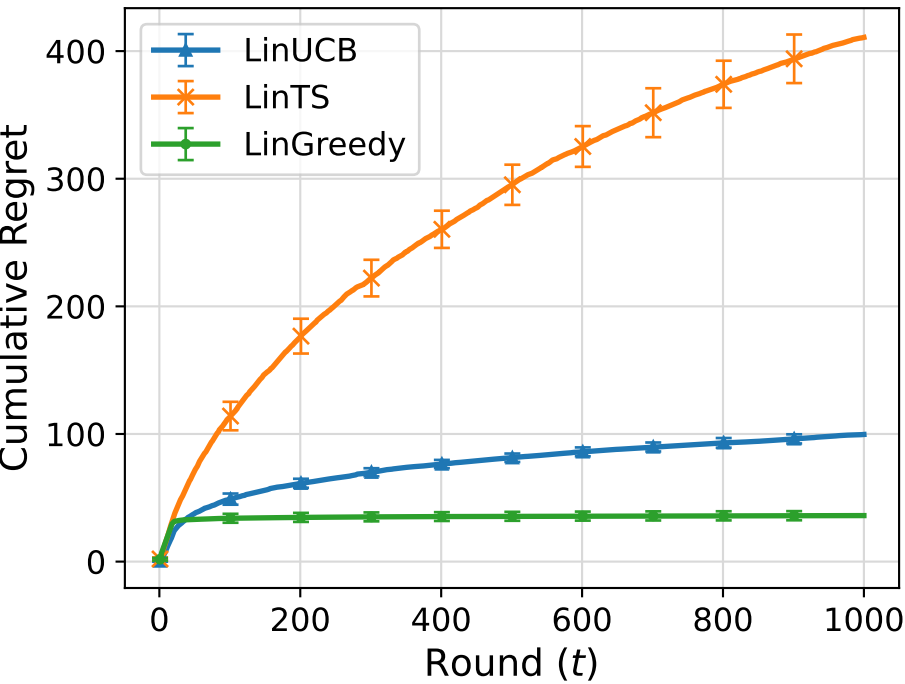

Supplement: supplementary_material [file attachment]

$d=20, K=20$ , Gaussian

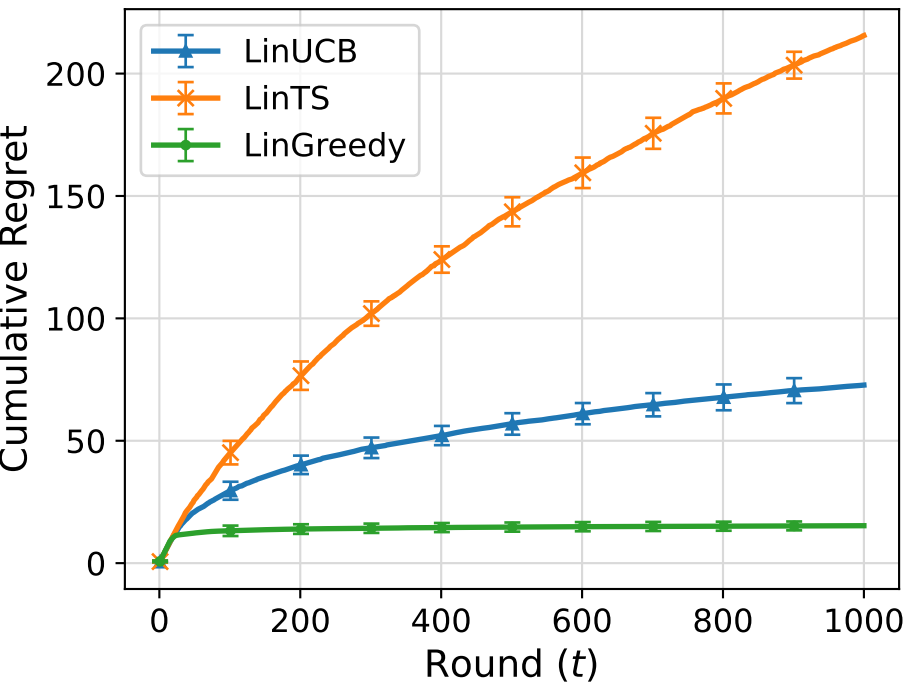

Supplement: supplementary_material [file attachment]

$d=20, K=100$ , Truncated Student  $t$

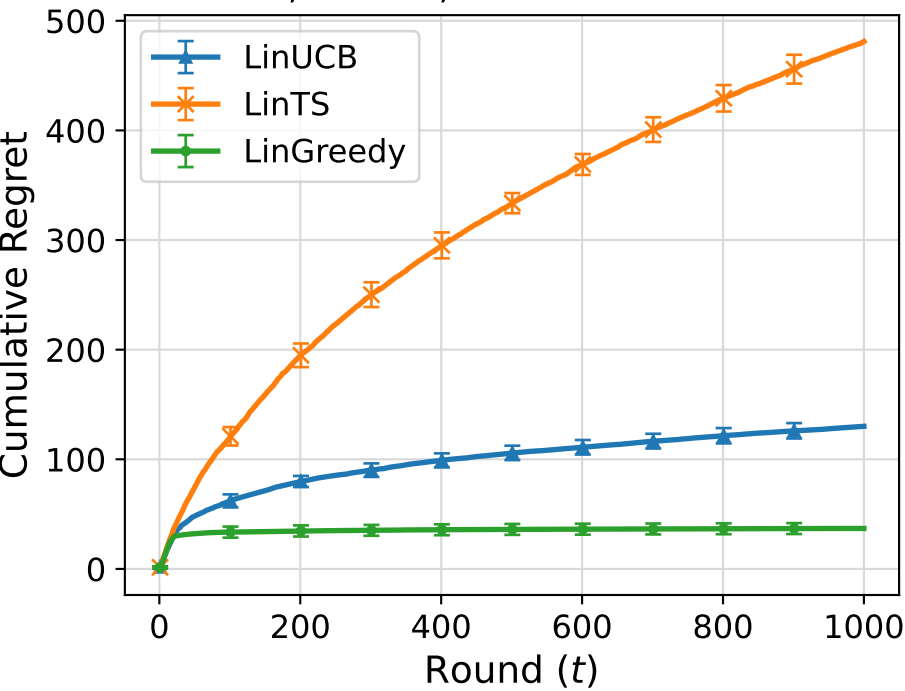

Supplement: supplementary_material [file attachment]

$d=20, K=20$ , Laplace

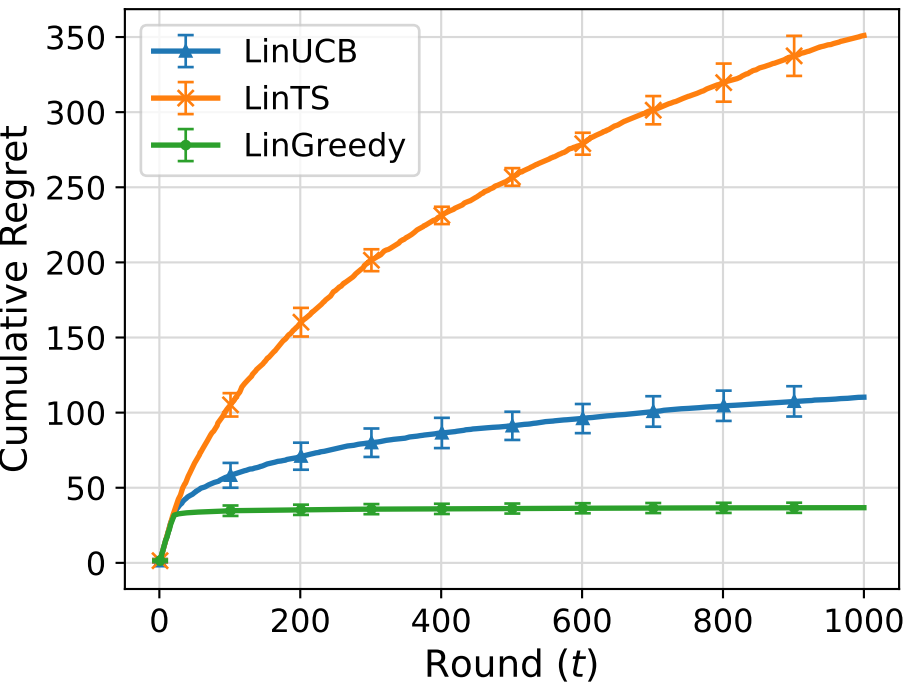

Supplement: supplementary_material [file attachment]

$d=100, K=20$ , Truncated Cauchy

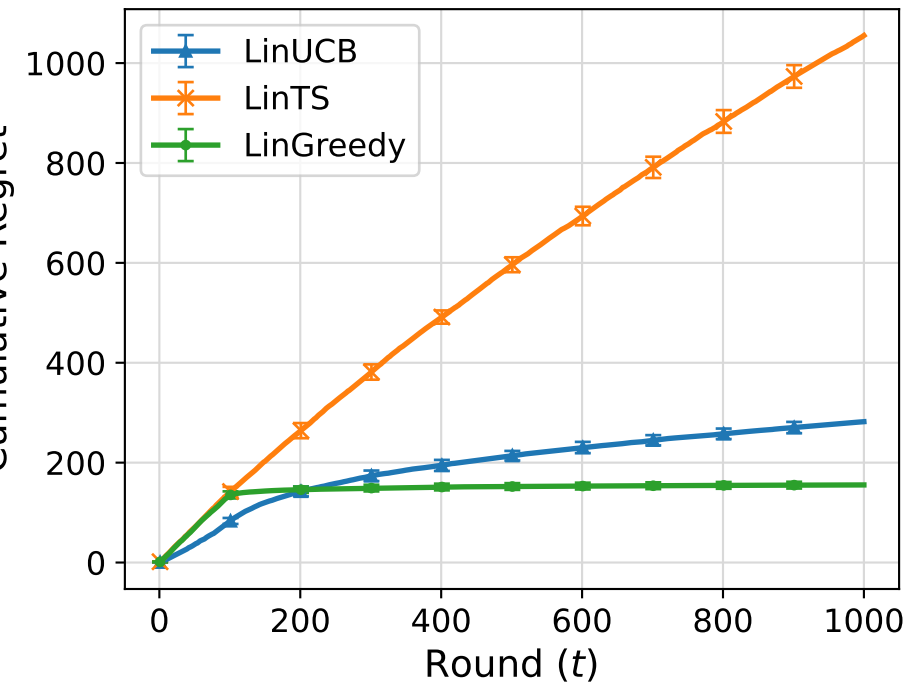

Supplement: supplementary_material [file attachment]

$d=100, K=20$ , Uniform

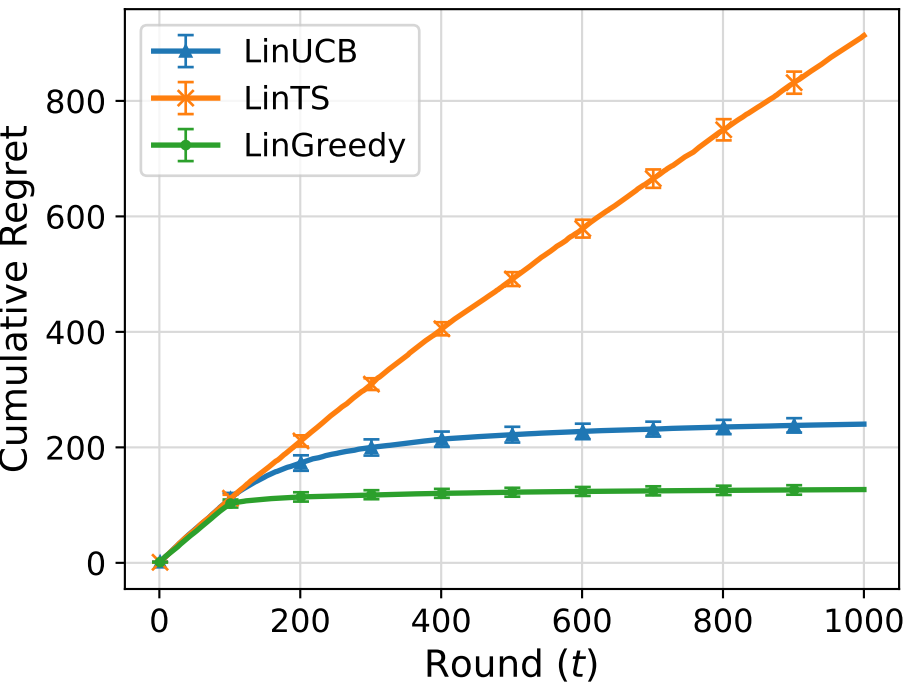

Supplement: supplementary_material [file attachment]

$d=20, K=100$ , Laplace

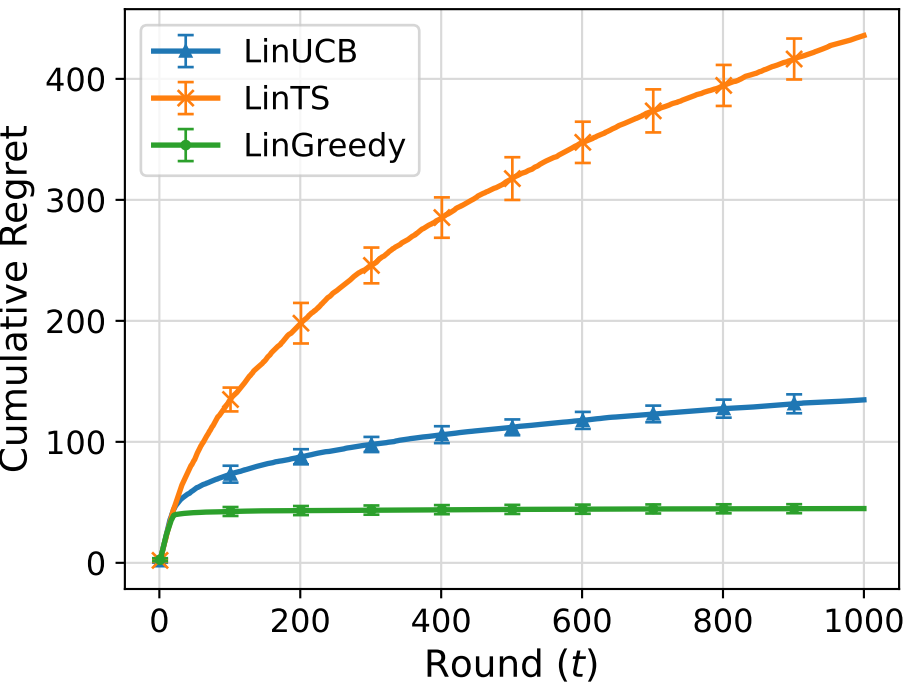

Supplement: supplementary_material [file attachment]

$d=20, K=100$ , Uniform

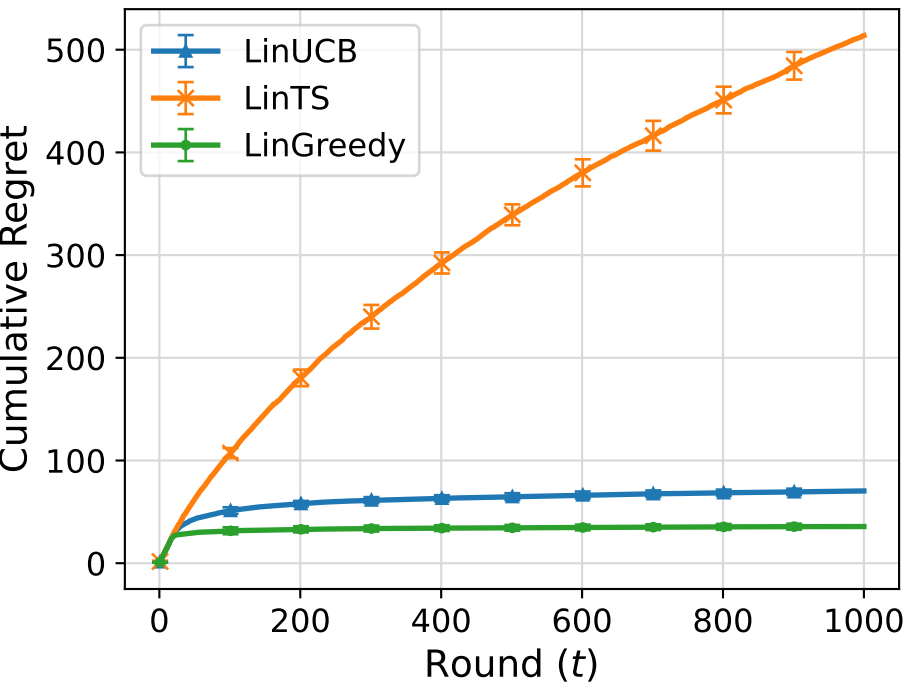

Supplement: supplementary_material [file attachment]

$d=100, K=20$ , Laplace

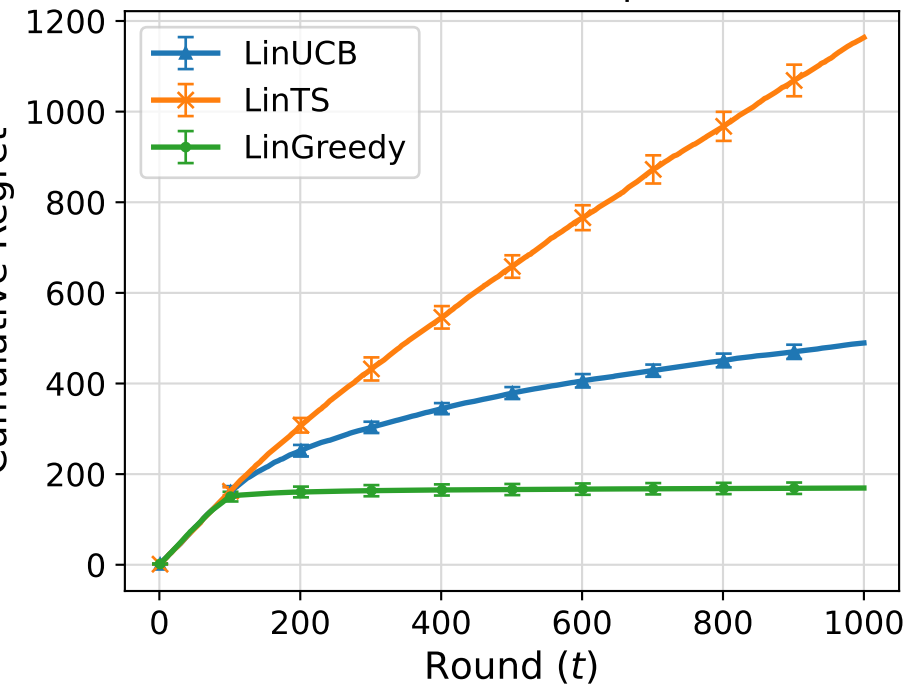

Supplement: supplementary_material [file attachment]

$d=100, K=20$ , Gaussian

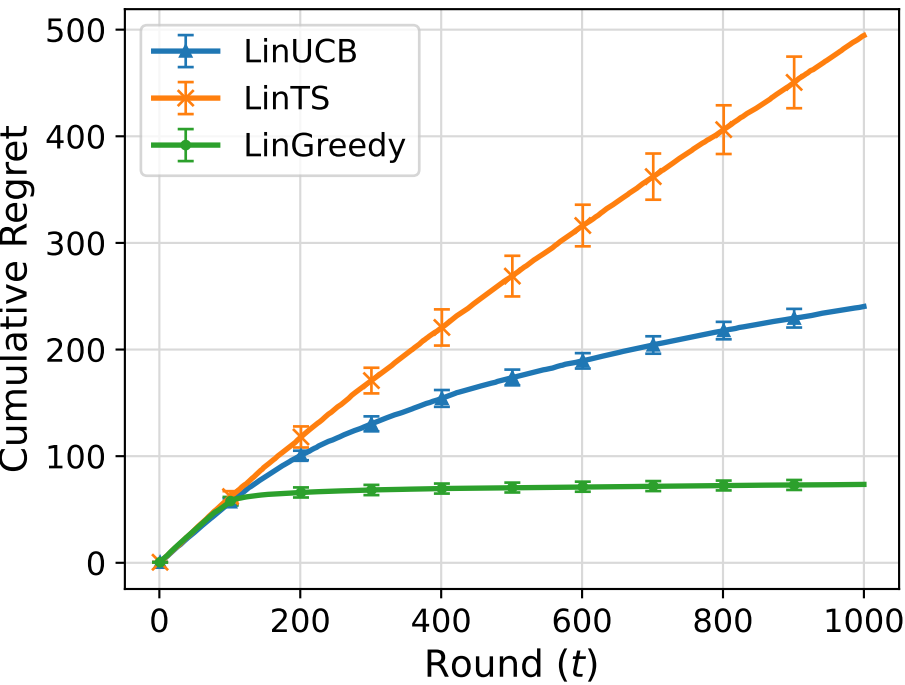

Supplement: supplementary_material [file attachment]

$d=20, K=100$ , Gaussian

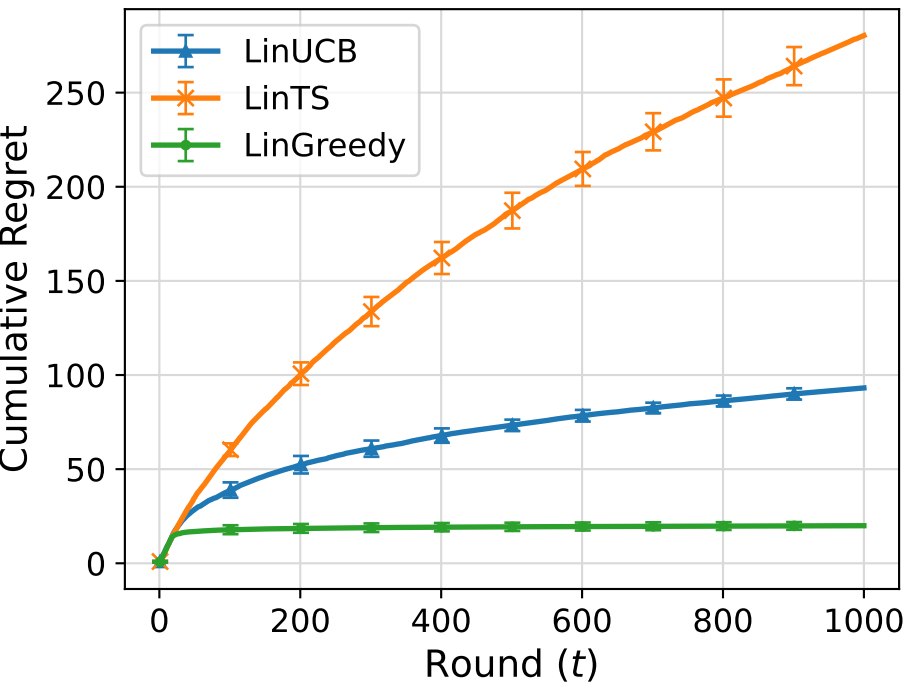

Supplement: supplementary_material [file attachment]

$d=20, K=20$ , Truncated Student  $t$

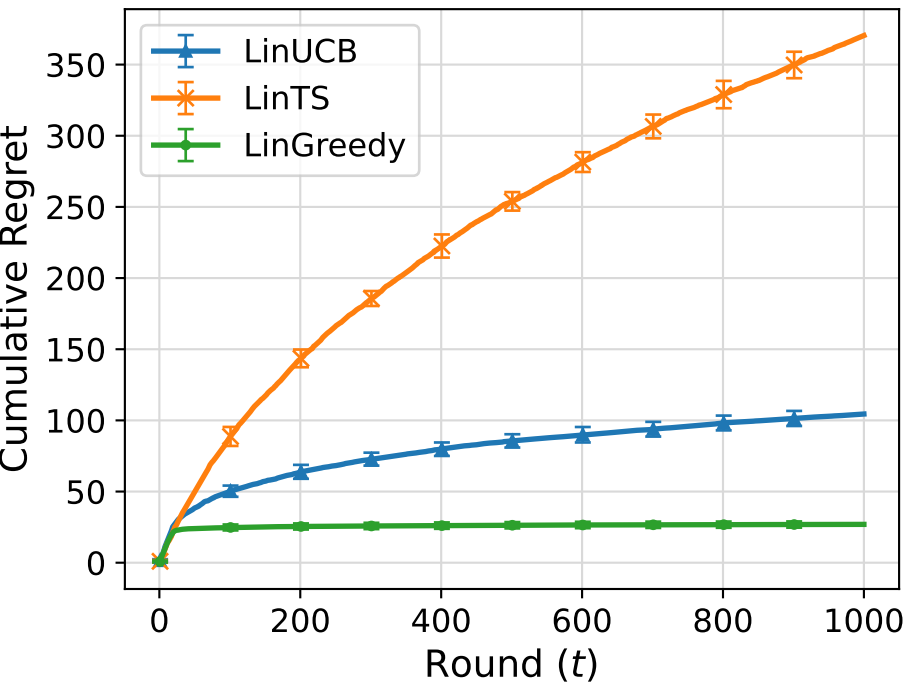

Supplement: supplementary_material [file attachment]

$d=20, K=20$ , Uniform

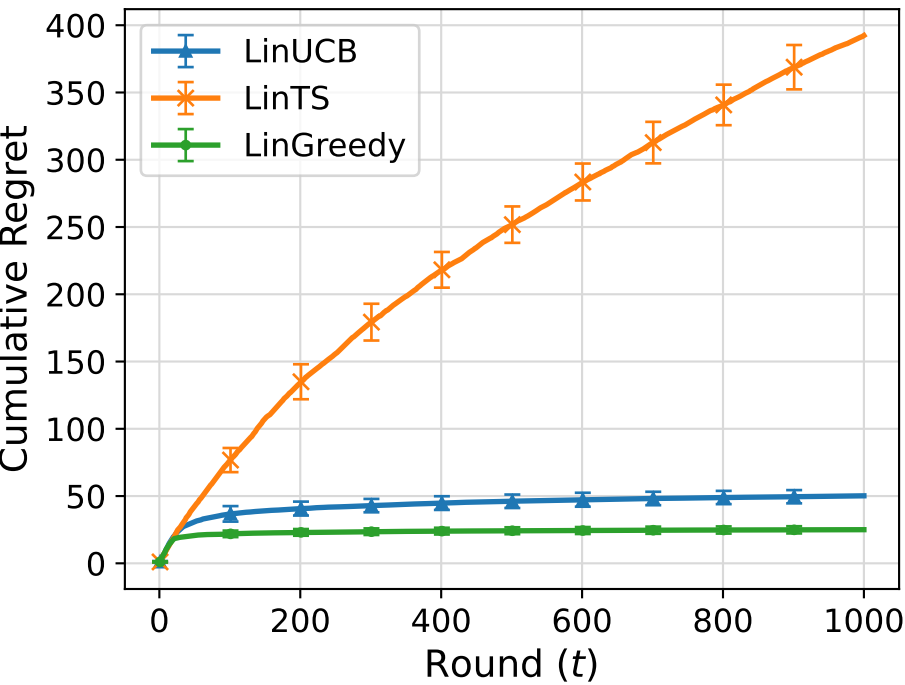

Supplement: supplementary_material [file attachment]
